# Supplementary material
Source: publisher figshare collection journal article supplement (https://acs.figshare.com/ndownloader/files/8855320)
Supplement: Supplementary file 1 [file 8855320]

# Supporting Information

## **Boosting Photocatalytic Performance of Inactive Rutile TiO<sub>2</sub> Nanorods under Solar Light Irradiation: Synergistic Effect of Acid Treatment and Metal Oxide Co-catalysts**

**Love Kumar Dhandole<sup>†</sup>, Mahadeo A. Mahadik<sup>†</sup>, Su-Gyeong Kim<sup>†</sup>, Hee-Suk Chung<sup>†</sup>,  
Young-Seok Seo<sup>†</sup>, Min Cho<sup>†</sup>, Jung Ho Ryu<sup>\*,§</sup>, and Jum Suk Jang<sup>\*,†</sup>**

<sup>†</sup>Division of Biotechnology, Brain Korea 21 Plus Program, Advanced Institute of Environment  
and Bioscience, College of Environmental and Bioresource Sciences, Chonbuk National  
University, Iksan, 54596, Korea

<sup>‡</sup>Analytical Research Division, Korea Basic Science Institute, Jeonju, Jeollabuk-do, 54907, South  
Korea

<sup>§</sup>Mineral Resources Research Division, Korea Institute of Geoscience and Mineral Resources,  
Daejeon 34132, Korea.

<sup>\*</sup>Corresponding authors. Tel.: (+82) 63 850 0846; fax: (+82) 63 850 0834.

E-mail: jangjs75@jbnu.ac.kr (J.S. J.), jryu@kigam.re.kr (J. H. R.).

**Table S1a** Band gap, binding energy peak position and corresponding EDAX analysis of TO-NR and ATO-NR samples

| Sr.No. | Sample Name    | <sup>a</sup> Band gap Energy (eV) | <sup>b</sup> Binding energy (eV) peak position |                        |                                 | <sup>c</sup> EDAX analysis of Na/ Ti (w %) (remaining amount oxygen) |
|--------|----------------|-----------------------------------|------------------------------------------------|------------------------|---------------------------------|----------------------------------------------------------------------|
|        |                |                                   | O1s (Ti-O)                                     | O1s (OH <sup>-</sup> ) | O1s (absorbed H <sub>2</sub> O) |                                                                      |
| 1.     | TO-NRs         | 2.97                              | 529.68                                         | 530.60                 | 531.73                          | 0.58/ 68.08                                                          |
| 2.     | TO-NRs [0.5 M] | 2.96                              | 529.73                                         | 530.50                 | 531.95                          | 00.16/ 58.03                                                         |
| 3.     | TO-NRs [1.0 M] | 2.99                              | 529.50                                         | 530.38                 | 531.70                          | 00.08/ 65.33                                                         |
| 4.     | TO-NRs [2.0 M] | 2.97                              | 529.61                                         | 530.59                 | 532.05                          | 00.06/ 56.02                                                         |

<sup>a</sup>Band gap energy measured by UV-DRS characterization (eV), <sup>b</sup>Binding energy measured by XPS characterization (eV) and X-ray energy dispersive spectrometer (EDAX) FESEM based Na/ Ti (wt %), remained amount given by oxygen.

**Table S1b** XPS analysis of O 1s OH peak in TO-NR and ATO-NR samples

| <b>O 1s (OH<sup>-</sup>) peaks</b> |                    |                            |             |                             |
|------------------------------------|--------------------|----------------------------|-------------|-----------------------------|
| <b>Sr.No.</b>                      | <b>Sample Name</b> | <b>Binding energy (eV)</b> | <b>FWHM</b> | <b>Area under the curve</b> |
| 1.                                 | TO-NRs             | 530.60                     | 1.13        | 6448.40                     |
| 2.                                 | TO-NRs<br>[0.5 M]  | 530.50                     | 1.31        | 7335.01                     |
| 3.                                 | TO-NRs<br>[1.0 M]  | 530.38                     | 1.12        | 8869.03                     |
| 4.                                 | TO-NRs<br>[2.0 M]  | 530.59                     | 1.32        | 7271.20                     |

**Table S2** Dye degradation efficiency of TO-NR and ATO-NR samples at 180 and 300 min, respectively.

| Sr.No. | Photocatalyst                        | Degradation efficiency in 180 min (in %) | Degradation efficiency in 300 min (in %) |
|--------|--------------------------------------|------------------------------------------|------------------------------------------|
| 1.     | TO-NRs                               | 04.92                                    | 08.42                                    |
| 2.     | 1.0 M ATO-NRs                        | 56.26                                    | 74.17                                    |
| 3.     | Cobalt oxide ** loaded TO-NRs        | 81.06                                    | 94.22                                    |
| 4.     | Cobalt oxide ** loaded 1.0 M ATO-NRs | 98.73*                                   | -                                        |

\*Cobalt oxide loaded 1.0 M acid treated sample showed synergistic effect over photocatalytic Orange (II) dye degradation; within 3 hours dye concentration reached its minimum value.

\*\*Cobalt oxide 1 wt % loading

**Table S3** Dye degradation efficiency of TO-NR and different concentrations of cobalt oxide loaded ATO-NR samples

| Sr.No. | <sup>*a</sup> Cobalt oxide concentration (in wt %) | Degradation efficiency in 180 min (in %) | Degradation efficiency in 300 min (in %) |
|--------|----------------------------------------------------|------------------------------------------|------------------------------------------|
| 1.     | <sup>*b</sup> TO-NRs                               | 04.92                                    | 08.42                                    |
| 2.     | 0.5                                                | 89.12                                    | 97.28                                    |
| 3.     | 1.0                                                | 98.73 <sup>*</sup>                       | -                                        |
| 4.     | 2.0                                                | 98.73                                    | -                                        |

<sup>\*a</sup> different concentration of cobalt oxide nanoparticles loaded on (1.0 M) ATO-NR.

<sup>\*b</sup> TO-NR is untreated sample.

<sup>\*</sup>Cobalt oxide loaded 1.0 M acid treated sample showed synergistic effect over photocatalytic Orange (II) dye degradation; within 3 hours dye concentration reached its minimum value.

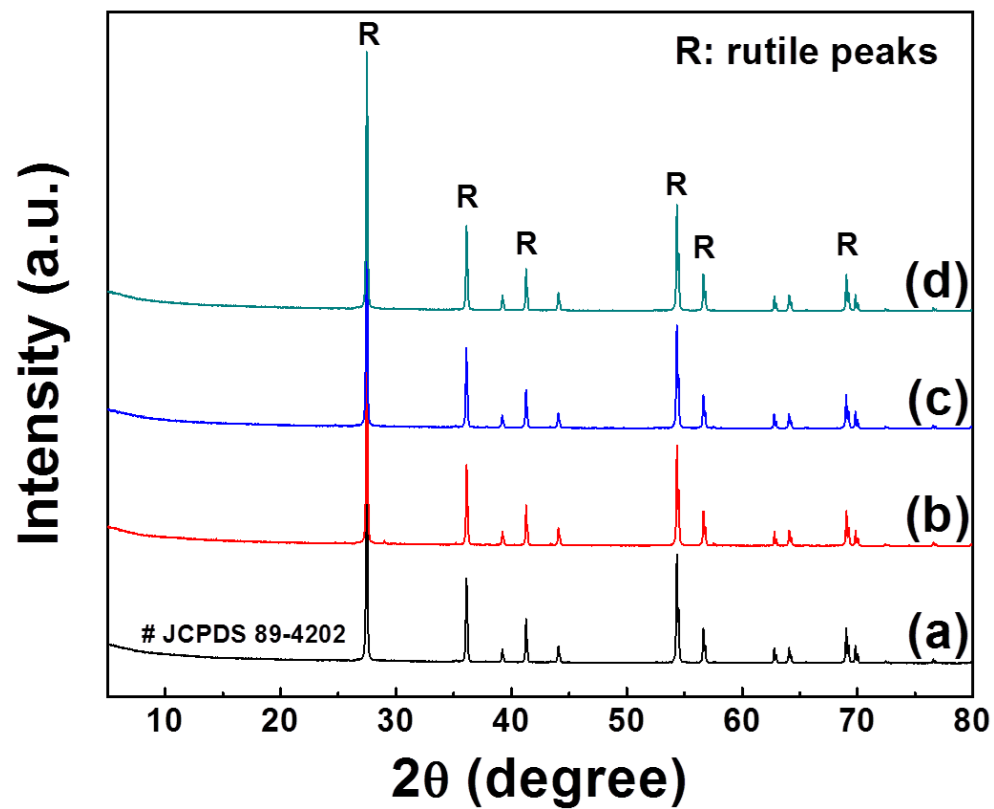

**Figure S1** XRD patterns of (a) TO-NRs, (b) ATO-NRs [0.5 M], (c) ATO-NRs [1.0 M] and (d) ATO-NRs [2.0 M].

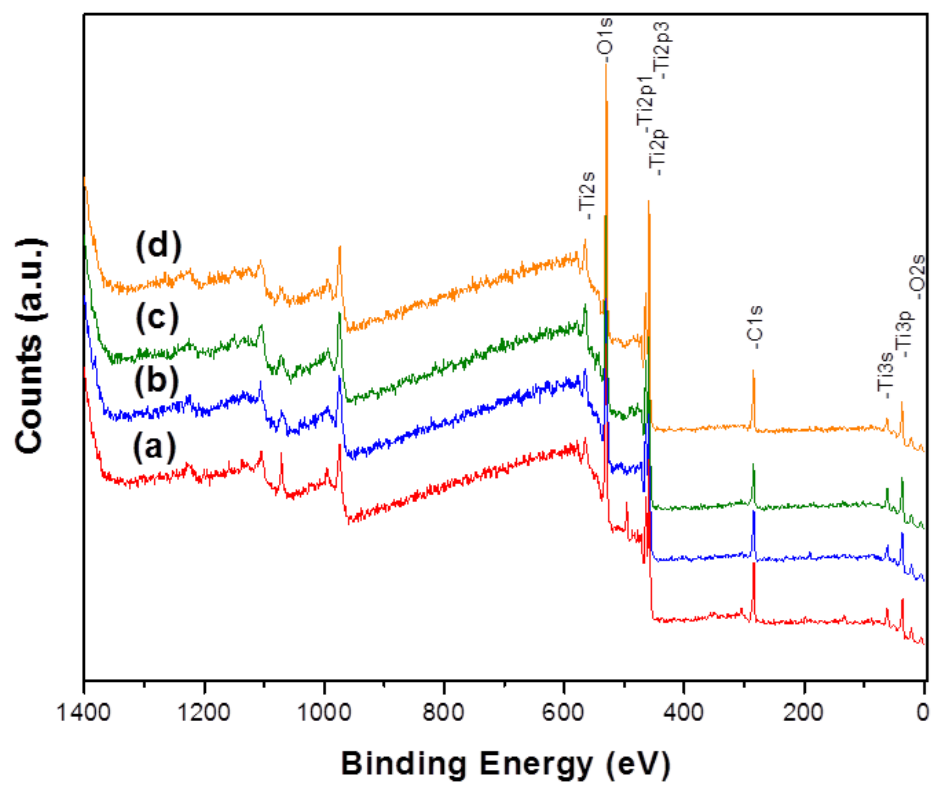

**Figure S2A** XPS survey scan of (a) as-prepared TO, (b) ATO-0.5 M, (c) ATO-1.0 M and (d) ATO-2.0 M -NRs samples.

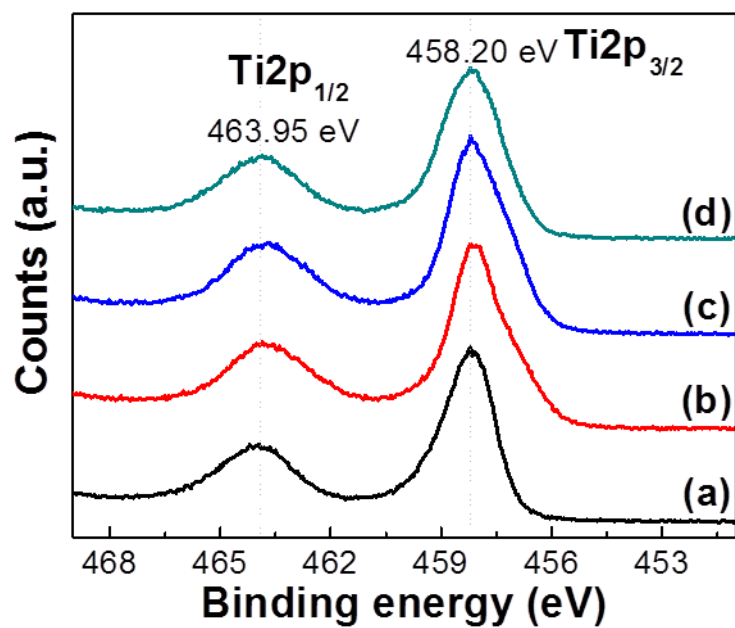

**Figure S2B** High resolution Ti 2p XPS spectra of (a) as-prepared TO, (b) ATO-0.5 M, (c) ATO-1.0 M and (d) ATO-2.0 M NR samples.



The optical properties of as-prepared TO-NRs and ATO-NRs were investigated by UV-vis spectroscopy (was shown in Fig. 4). The light absorbance edge ( $\lambda_g$ ) of as-prepared NRs was around 414.6 nm; due to the broad band gap energy ( $\sim 3.00$  eV) allows only UV-light and similar to the reported rutile  $\text{TiO}_2$ . [66] [67] No significant red shift was observed for acid treated samples, these results indicated that acid treatment could not give enhancement in light absorbance. The optical properties of as-prepared and acid treated TO-NRs are summarized in Table 1.

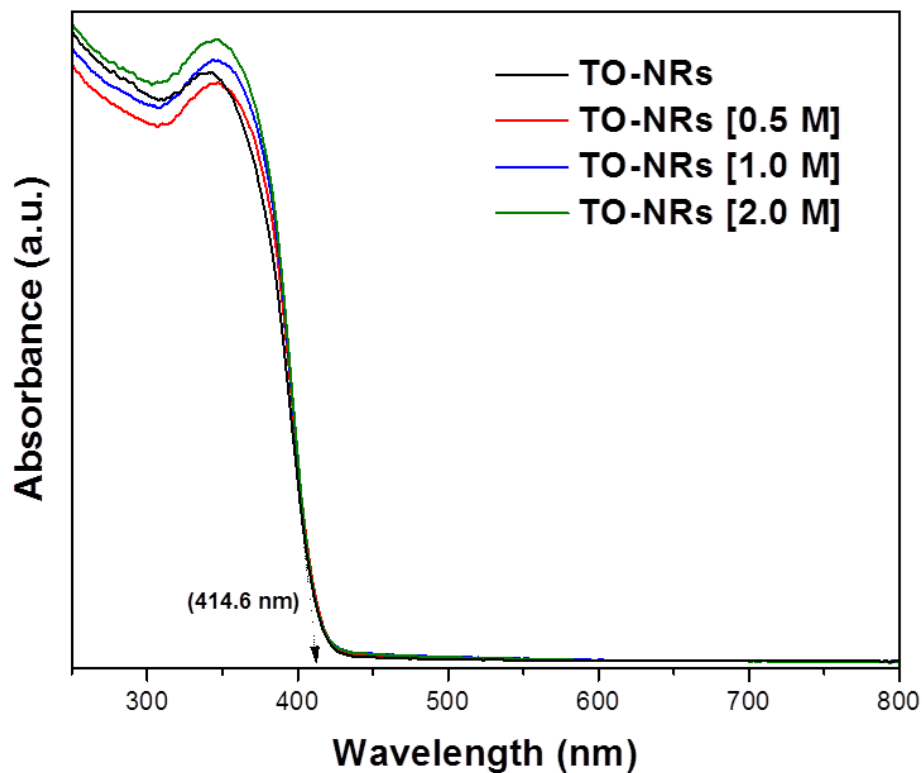

**Figure S2C** UV-vis spectra of (a) TO, (b) ATO-0.5 M, (c) ATO-1.0 M and (d) ATO- 2.0 M.

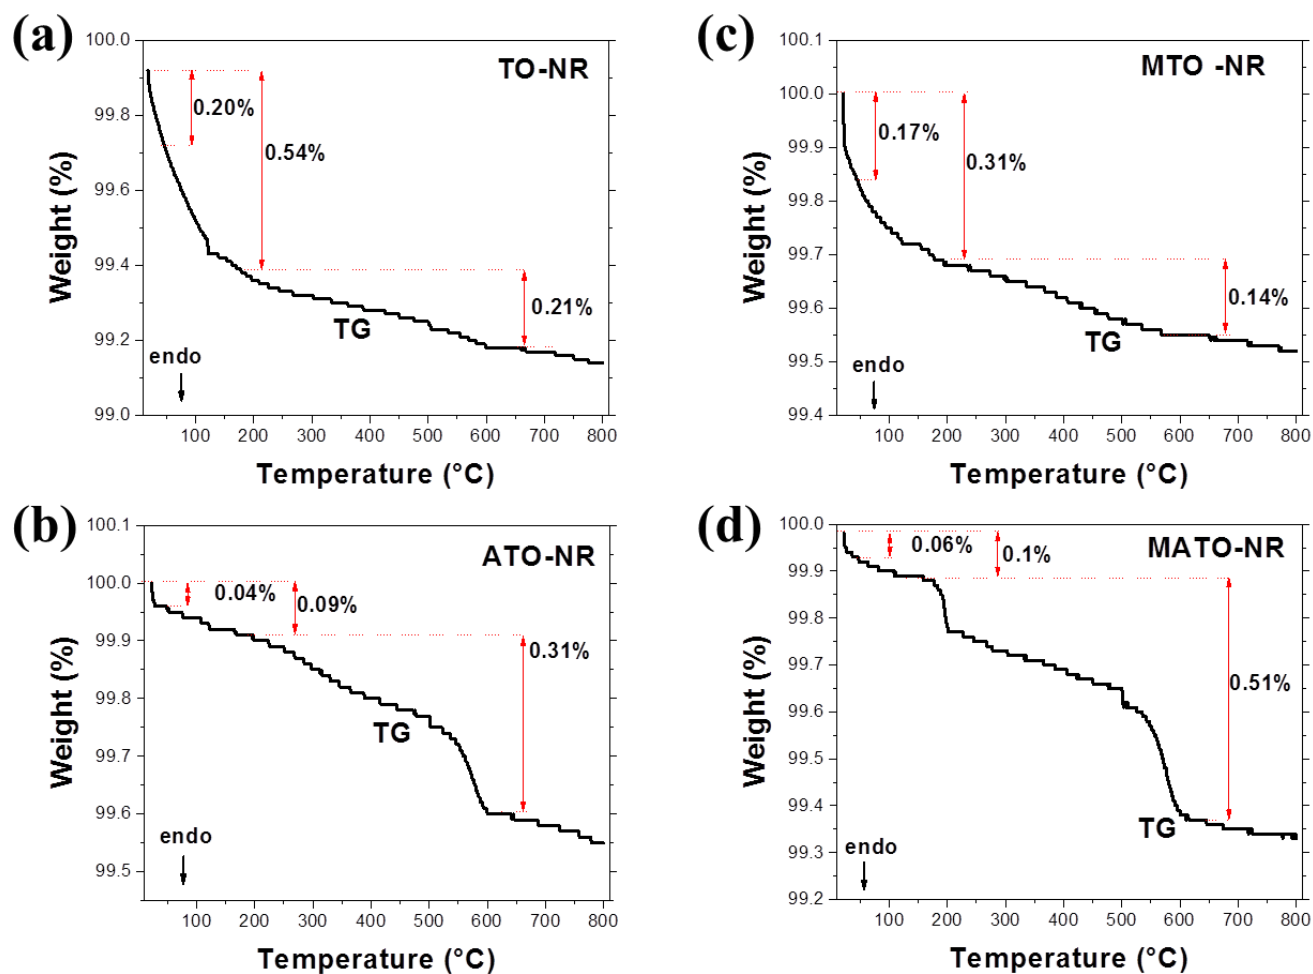

**Figure S3** TGA analysis of (a) TO-NR, (b) ATO [1.0 M]-NRs, (c) Co/TO-NR (MTO-NR) and (d) Co/ATO-NR (MATO-NR) samples.

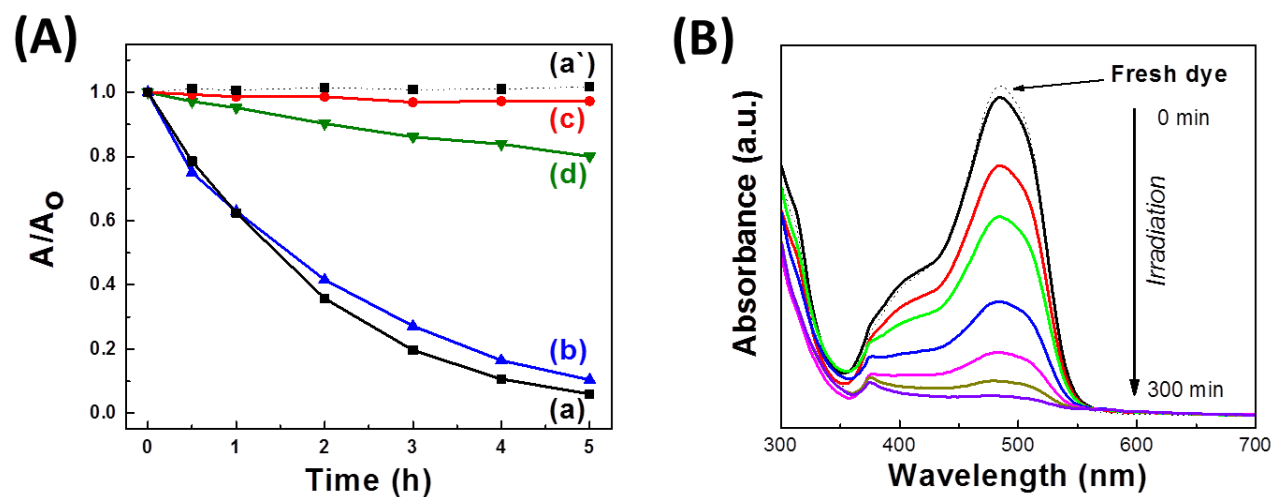

**Figure S4 (A)** Effect of different 1 wt % metal oxide loading over TO-NRs (MTO-NRs) samples for photocatalytic Orange (II) dye degradation under solar light (a) Co/TO-NRs, (b) Cu/TO-NRs, (c) Mn/TO-NRs, and (d) Ni/TO-NRs and **(B)** Orange (II) dye degradation by 1 wt % Co/TO-NRs photocatalyst. (where “M = metal oxide” abbreviated by element identity; e.g. M = Co/ or Cu/ or Mn/ or Ni/)

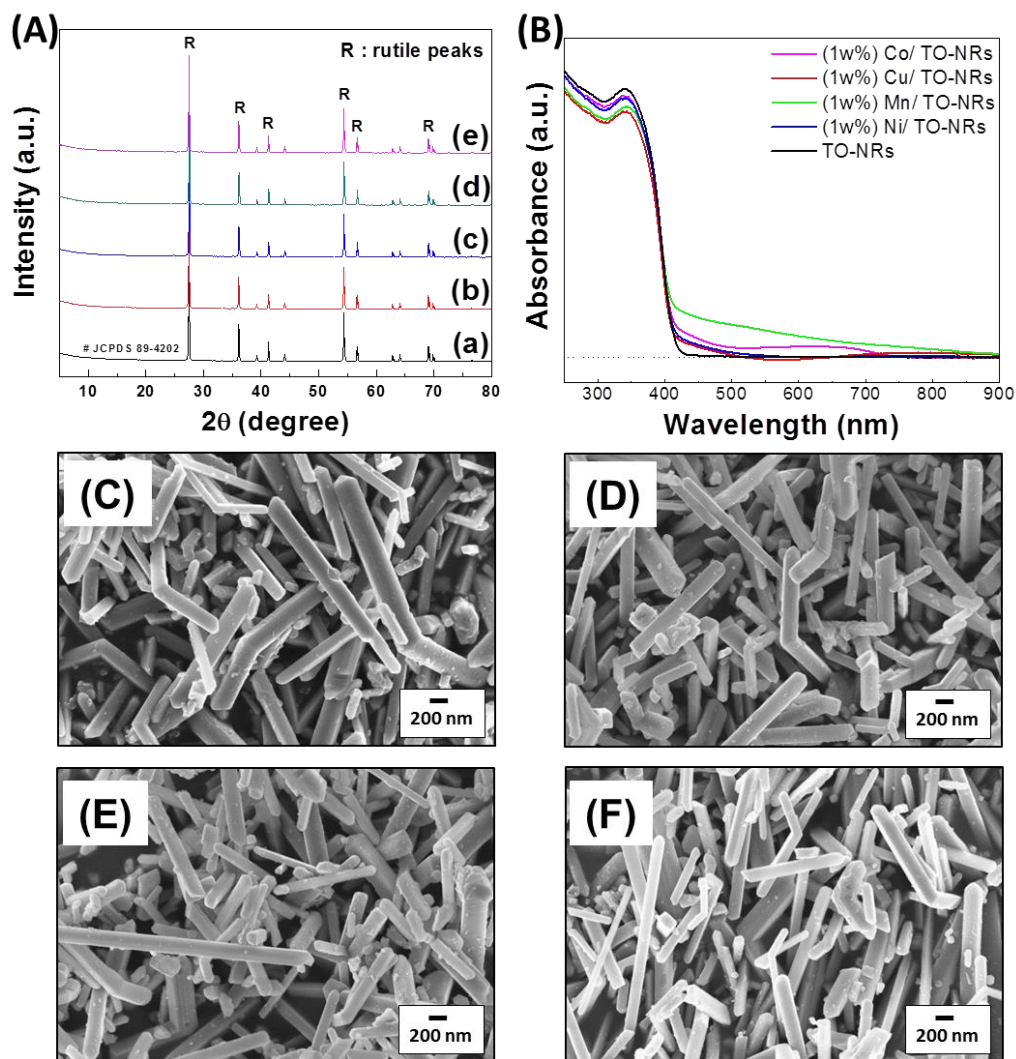

**Figure S5** (A) XRD images of (a) as-prepared TO-NRs, and 1 wt % metal loaded samples as, (b) Co/TO-NRs, (c) Cu/TO-NRs, (d) Mn/TO-NRs, and (e) Ni/TO-NRs; (B) UV-vis spectra of as-prepared and metal oxide loaded (untreated) TO-NRs; FE-SEM images of MTO samples as (1 wt %) metal loading on TO-NRs- (C) Co/TO-NRs, (D) Cu/TO-NRs, (E) Mn/TO-NRs and (F) Ni/TO-NRs. (where “M = metal oxide” abbreviated by element identity; e.g. M = Co/ or Cu/ or Mn/ or Ni/)

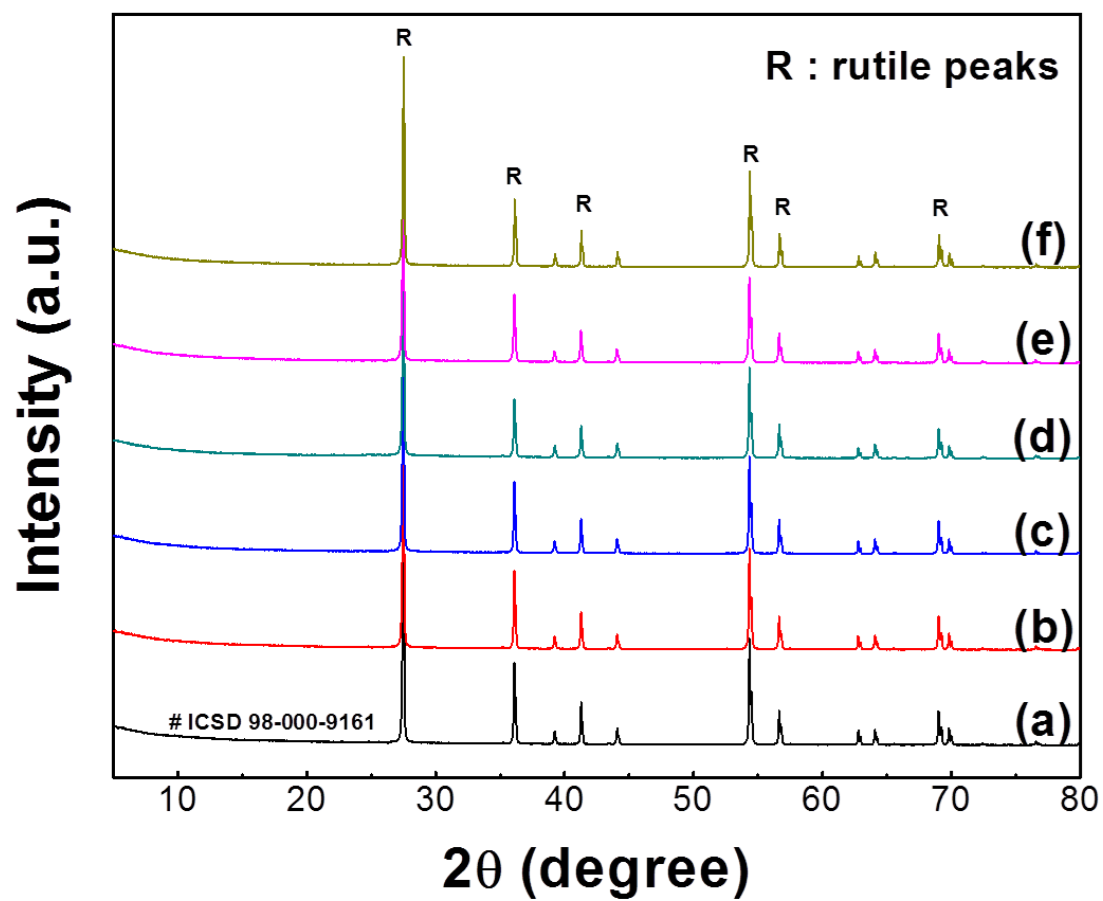

**Figure S6** XRD patterns of (a) as-prepared TO-NRs (untreated), and (b) TO-NRs, (c) (0.5 wt %), (d) (1.0 wt %), (e) (1.5 wt %), (f) (2.0 wt %) of cobalt oxide loaded on [1.0 M] acid treated NRs.

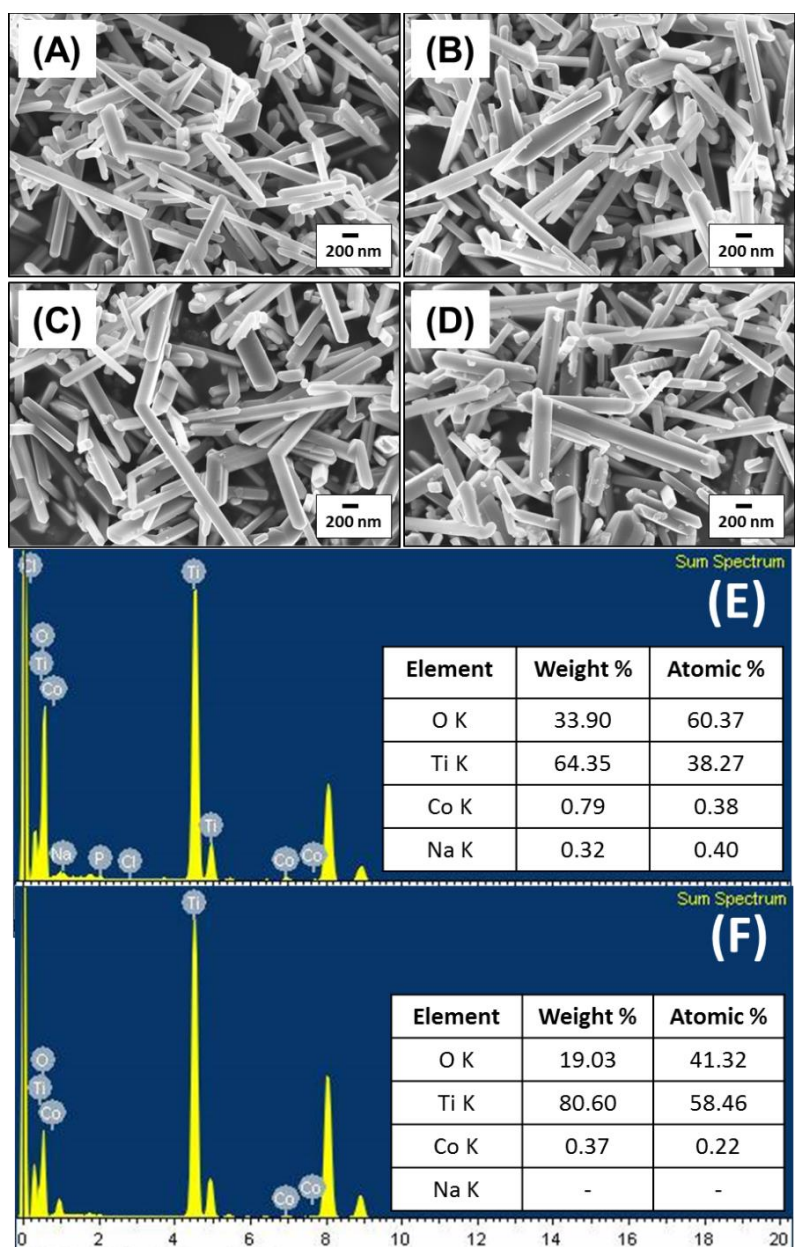

**Figure S7** FE-SEM image of MATO samples as (1 wt %) metal loading on (1.0 M) acid treated NRs- **(A)** Co/ATO-NRs, **(B)** Cu/ATO-NRs, **(C)** Mn/ATO-NRs and **(D)** Ni/ATO-NRs; TEM/EDAX images of MTO-NRs **(E)** and MATO-NRs **(F)**. (where “M = metal oxide” abbreviated by element identity; e.g. M = Co/ or Cu/ or Mn/ or Ni/)

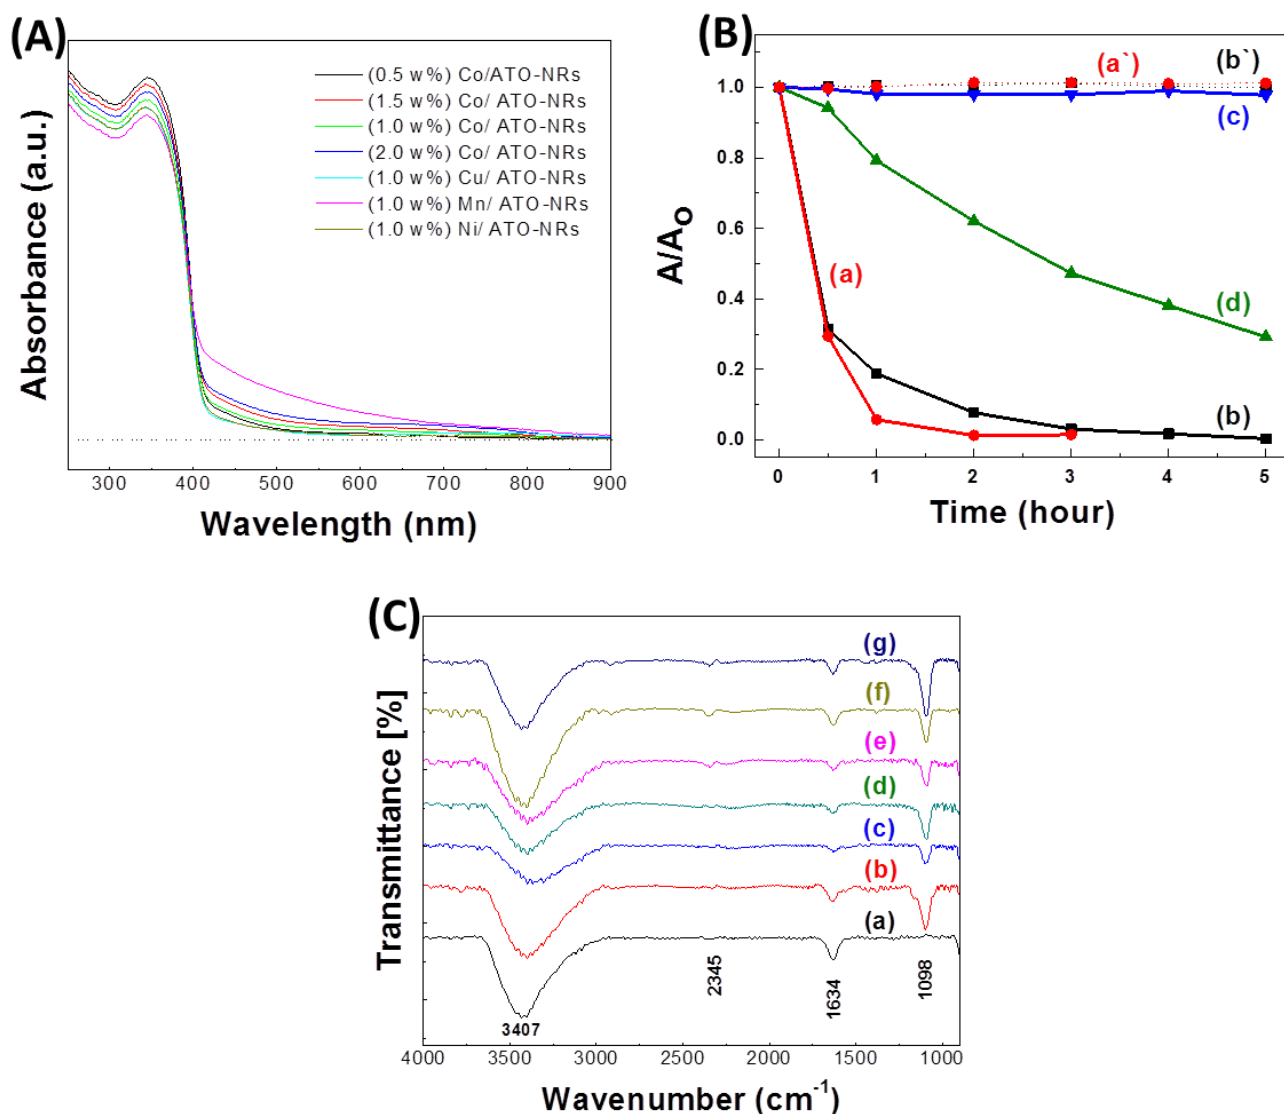

**Figure S8 (A)** UV-vis spectra of MATO-NRs **(B)** Effect of different 1 wt % metal loaded ATO-NRs photocatalyst samples over photocatalytic Orange (II) dye degradation under solar light (a) Co/ATO-NRs, (b) Cu/ATO-NRs, (c) Mn/ATO-NRs, and (d) Ni/ATO-NRs and **(C)** FT-IR spectra of (a) ATO-NRs [1.0 M], (b) (1 wt %) Co/TO-NRs, (c) (0.5 wt %) Co/ATO-NRs [1.0 M], (d) (1.0 wt %) Co/ATO-NRs [1.0 M], (e) (1.5 wt %) Co/ATO-NRs [1.0 M], (f) (2.0 wt %) Co/ATO-NRs [1.0 M], and (g) (1 wt %) Cu/ATO-NRs [1.0 M]. (where ‘M = metal oxide’ we abbreviated by element identity; e.g. M = Co/ or Cu/ or Mn/ or Ni/)

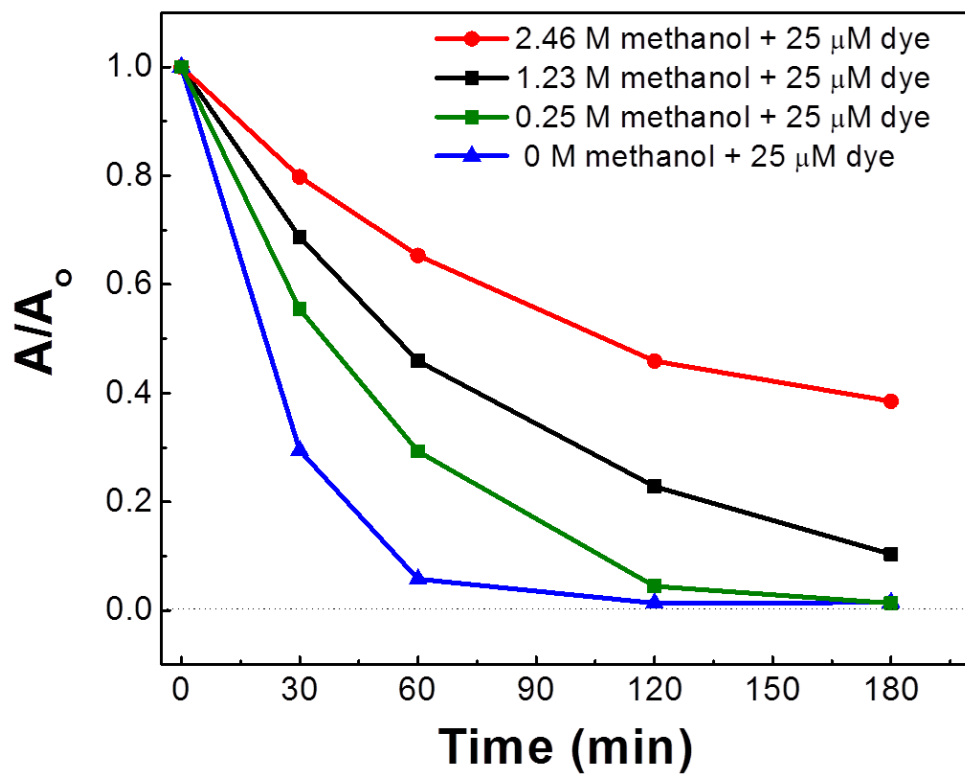

**Figure S9** Photocatalytic performance of Co/ATO-NRs photocatalyst over different concentrations of methanol and fixed concentration of Orange (II) dye solution.



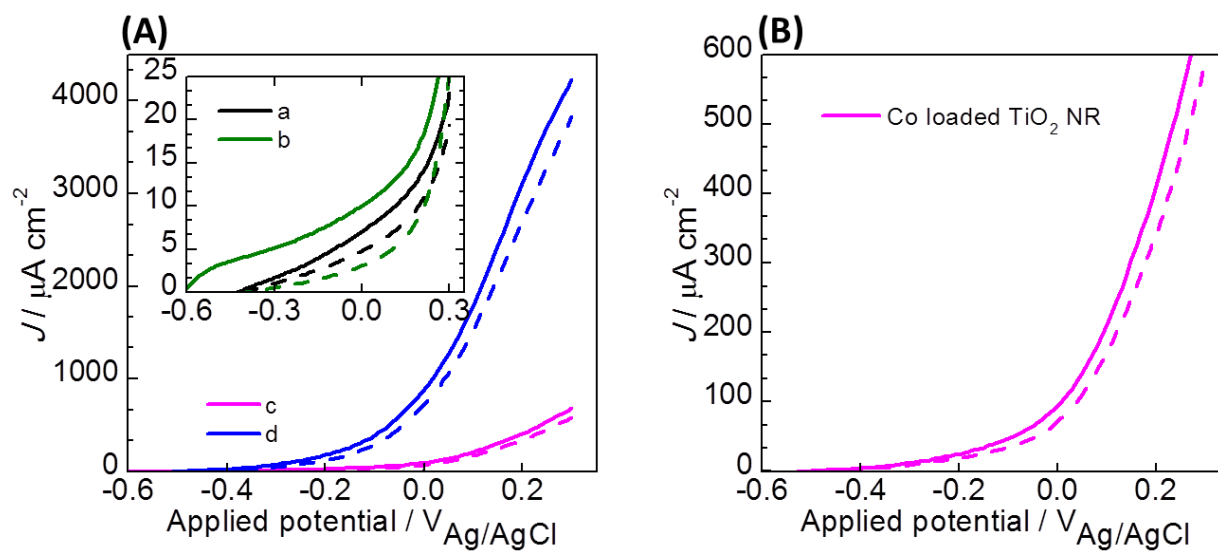

**Figure S10** (A)  $J$ - $V$  curves under white-light illumination. Note: The solid lines indicate  $J$ - $V$  under light illumination and dash-dotted line indicates the dark current; (B)  $J$ - $V$  curves under solar light illumination for Co loaded  $\text{TiO}_2$  NRs.

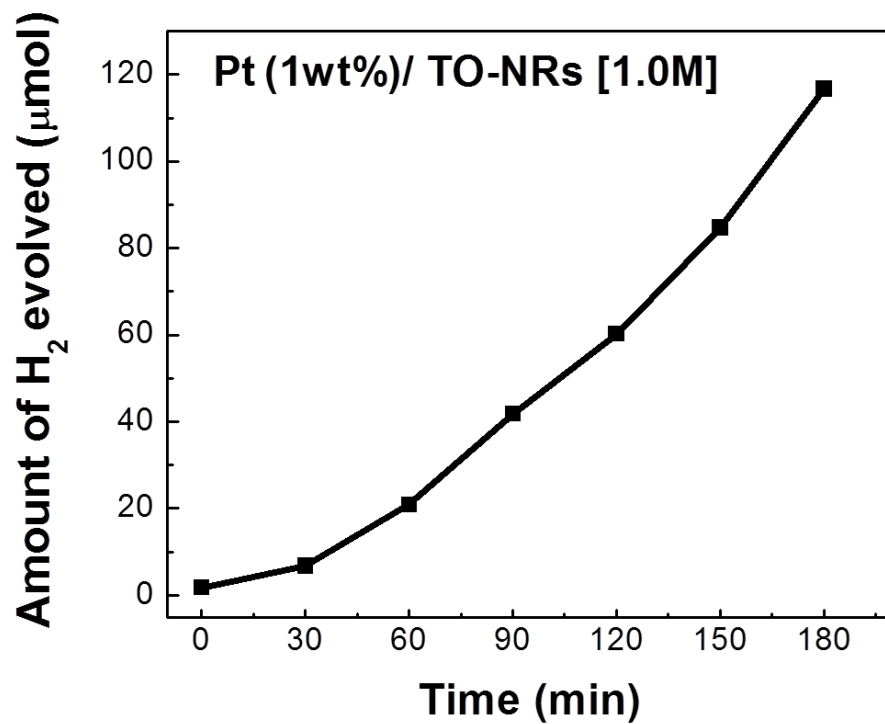

**Figure S11** Photocatalytic hydrogen production over Pt/ATO-NRs photocatalysts platinized by wet impregnation method and calcined inside tubular furnace at 400°C to reduce Pt into Pt<sup>0</sup> under continuous hydrogen gas flow. (Catalyst = 0.11 g loaded with 1 wt % Pt, electrolyte: methanol + water mixed 40 mL volume, under solar light irradiation.)
